# Supplementary material
Source: publisher figshare collection journal article supplement (https://tandf.figshare.com/articles/dataset/_/1393337)

# Crystal structures of amino acids: from bond lengths in glycine to metal complexes and high pressure polymorphs

Carl Henrik Görbitz

*Department of Chemistry, University of Oslo, N-0315 Oslo, Norway*

Schematic illustrations of amino acids in the Cambridge Structural Database identified by their refcodes.

For organic structures the following applies to the listed refcodes:

|                |                                                                                 |
|----------------|---------------------------------------------------------------------------------|
| <b>REFCOD</b>  | racemic structure                                                               |
| <b>REFCOD</b>  | enantiopure structure                                                           |
| <b>REFCOD</b>  | achiral compound                                                                |
| <b>REFCOD</b>  | hydrate                                                                         |
| <b>REFCOD</b>  | complex                                                                         |
| <b>REFCOD</b>  | compound of biological relevance, common name given directly below if available |
| <b>+REFCOD</b> | polar head with positive charge [c(0), c(1) or c(2)]                            |
| <b>-REFCOD</b> | polar head with negative charge [a(0), a(-1) or a(-2)]                          |

If a substance has been crystallized in different states, the illustration will appear under z(0) (if applicable).

For metalloorganic structures other font codes apply, see page 18.

|                         |                                  |                                         |         |
|-------------------------|----------------------------------|-----------------------------------------|---------|
| z(0)                    | acyclic                          | 110 structures                          | page 2  |
| z(-2), z(-1) and z(1)   | acyclic                          | 3 + 7 + 9 = 19 structures               | page 6  |
| c(0)                    | acyclic                          | 22 structures                           | page 7  |
| c(1)                    | acyclic                          | 21 structures                           | page 8  |
| c(2)                    | acyclic                          | 6 structures                            | page 9  |
| z(0), z(1)              | acyclic, dimeric                 | 8 + 3 = 11 structures                   | page 10 |
| z(0)                    | cyclic                           | 40 structures                           | page 11 |
| c(1), n(0), a(-1), a(0) | cyclic                           | 5 + 11 + 3 + 4 = 23 structures          | page 13 |
| z(0)                    | C <sup>α</sup> -alkylated cyclic | 30 structures                           | page 14 |
| z(0)                    | C <sup>α</sup> -alkylated other  | 12 + 2 + 1 = 15 structures              | page 15 |
| c(1)                    | C <sup>α</sup> -alkylated all    | 11 + 1 + 1 = 13 structures              | page 16 |
| n(0), c(1)              | acyclic esters                   | 14 structures (+ 8 from standard acids) | page 17 |
| a(0)                    | acyclic metal ligands            | 42 structures                           | page 18 |

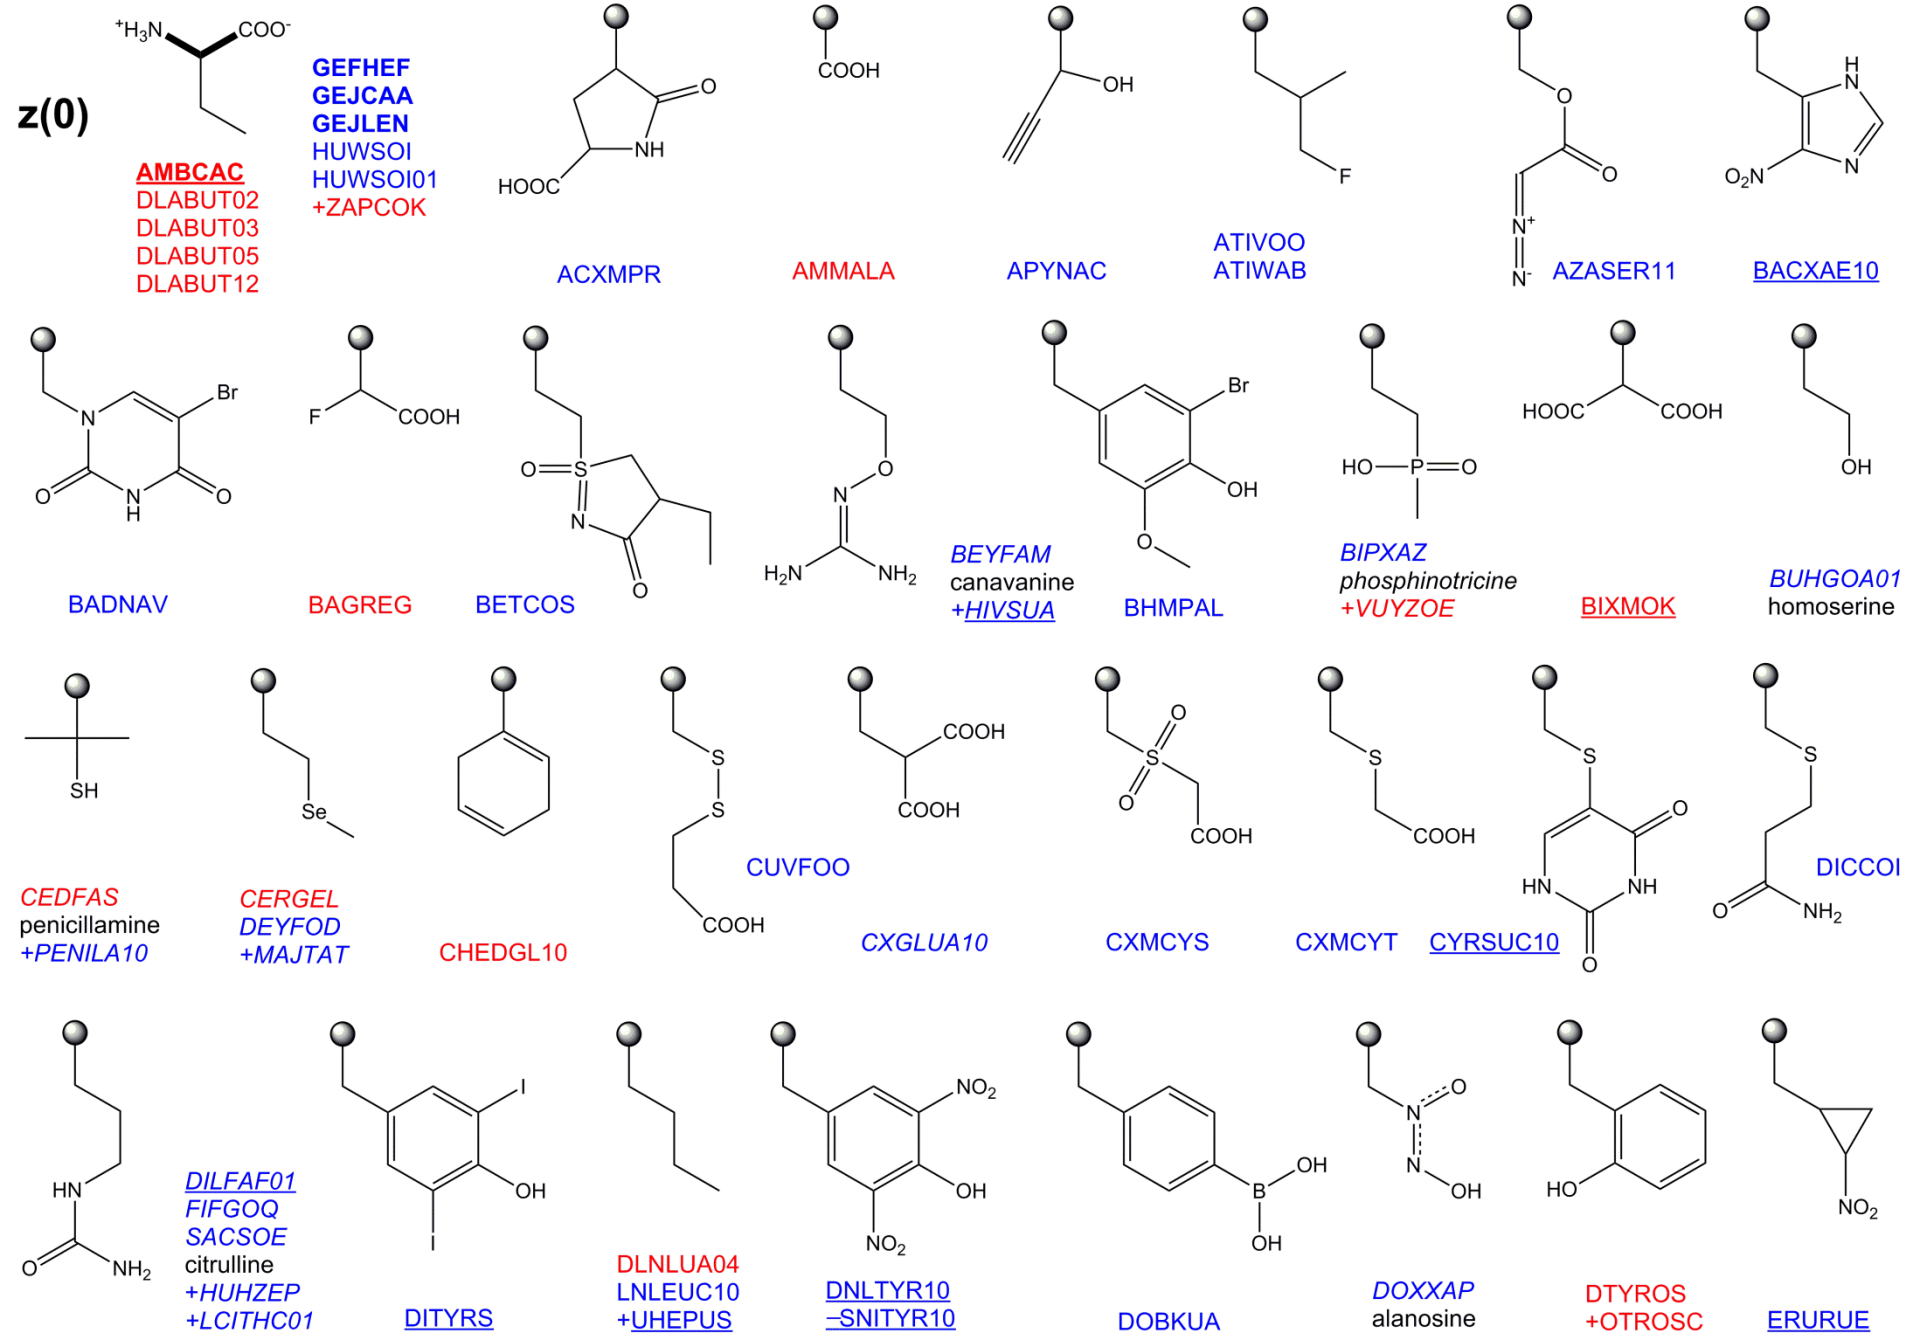

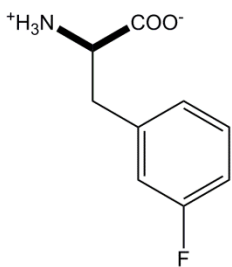

[EXAXAC](#)

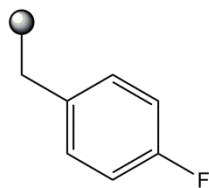

[EXAXEG](#)

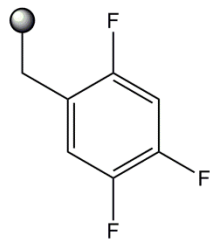

[EXAXIK](#)

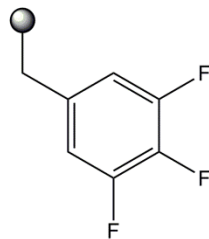

[EXAXOQ](#)

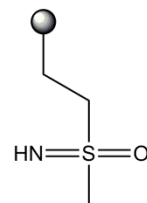

[FADVUB](#)  
[METTSO10](#)

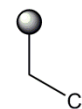

[FEGMAG](#)

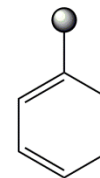

**FIVGEW**  
[+CABVUX](#)  
[+FAPMIT](#)  
[+FAPMOZ](#)  
**+GACVIP**  
**+HAZGIZ**  
[+IROVEQ](#)  
[+NILXUB](#)  
[+RENKUQ](#)  
[+TEHYUA](#)  
[+WIHJII](#)  
[+XALCOC01](#)  
[+XALCUI](#)  
[+XALDAP](#)

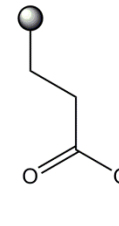

[GAVRAX](#)

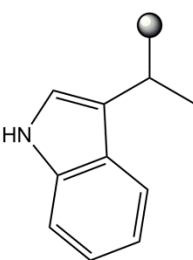

[GUDNIC](#)

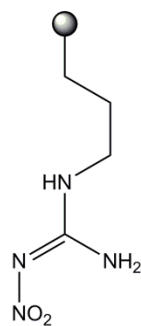

[HIVLAA01](#)  
[+SIXKIM](#)  
[+WIKNUZ](#)

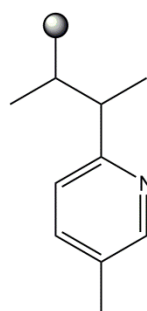

[HMEBUT](#)

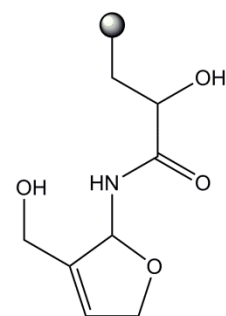

[HMFGLA](#)

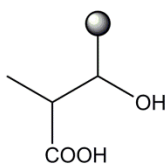

[HMGLUT](#)

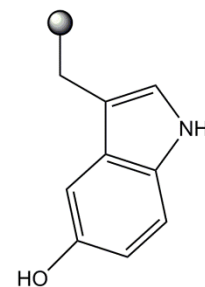

**HTRYPT10**  
**MUYTEG**  
**MUYTOQ**  
**MUYVAE**

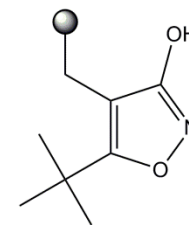

**HUKFUO**

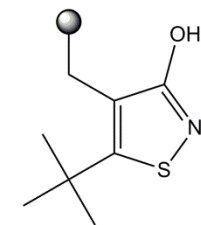

[HUKGAV\\*](#)

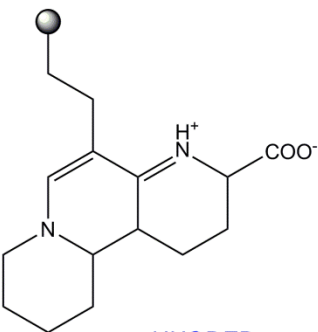

[HUQDED](#)  
 oryzamutaic acid E

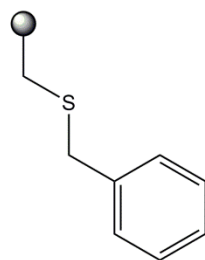

[ICAMOO](#)

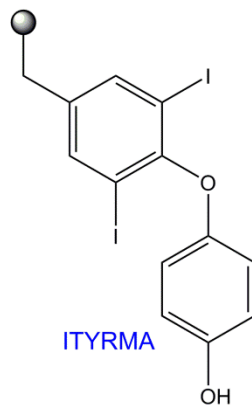

[ITYRMA](#)

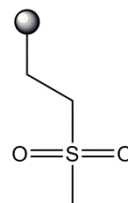

[IMIWUW](#)

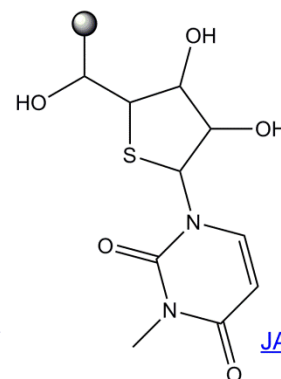

[JAPLIV](#)

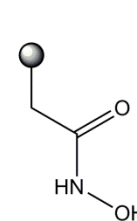

**JORDID**

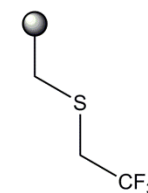

[JOXBED](#)

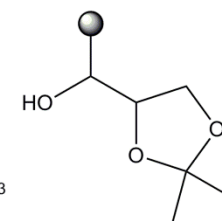

[JOVKUA](#)

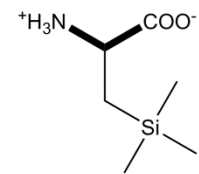

KUKMAF

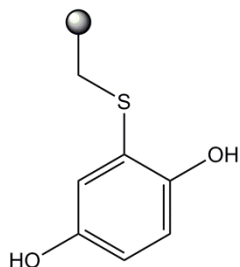

KURCOQ

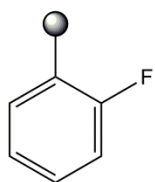

LALXAX

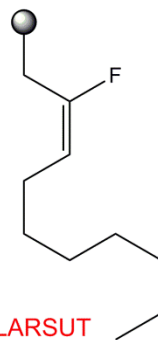

LARSUT

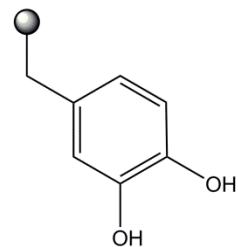

LDOPAS03  
L-dopa  
+LDOPAC01

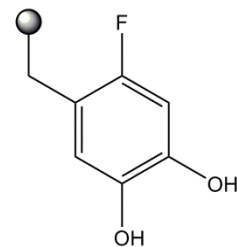

LEQTEG

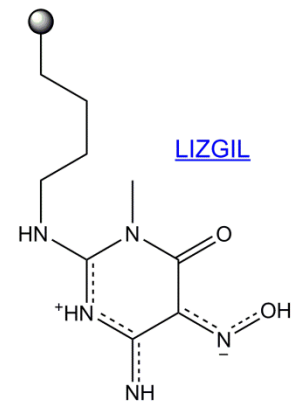

LIZGIL

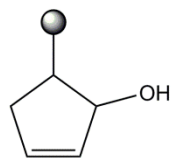

LOZPAR

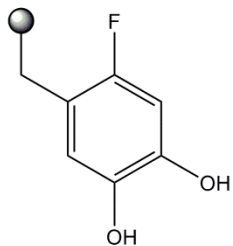

LTXPSE

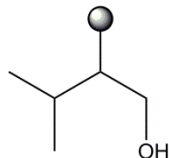

MATVIM

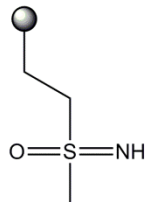

METTSO10

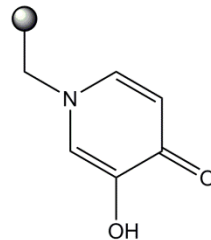

MIMOSN  
mimosine  
+LMIMOS

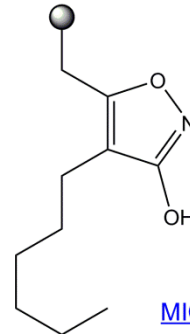

MIQNEF

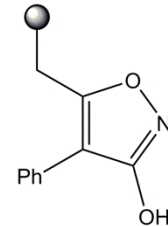

MIQNIJ

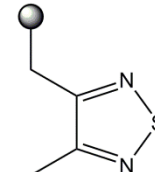

MOFGOD

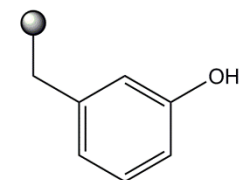

MTYROS01

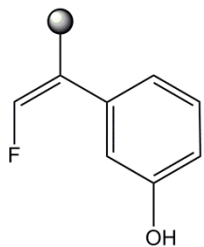

NANYIK

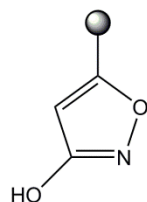

OBEKUB

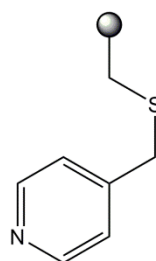

OCAZOI

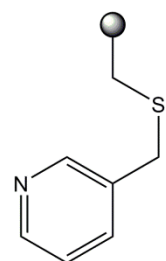

OCAZUO

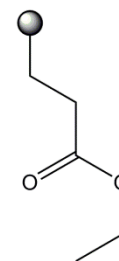

PAZHEE

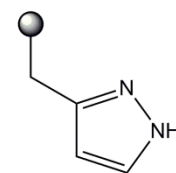

PYRZAL10

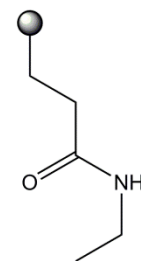

QAJXOQ

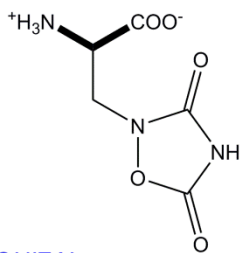

**QUIZAL**  
quisqualic acid

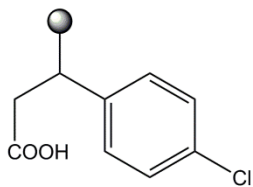

**RAYWIX**  
**RAYWOD**

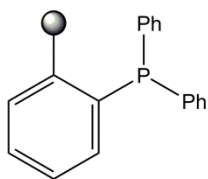

**RIJFOF**

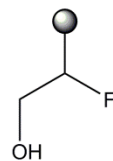

**RIQBUO**

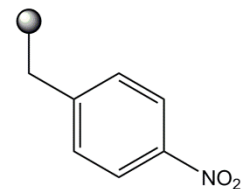

**RIYTUP**  
**+CUDSEK**  
**+NIPALA**

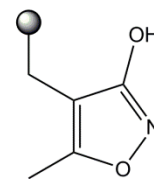

**RSAMPA**

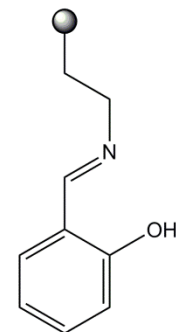

**SAQQIK**

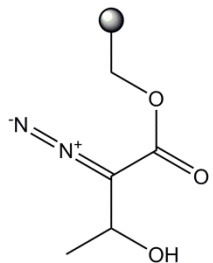

**SAWGOM**  
thrazarine

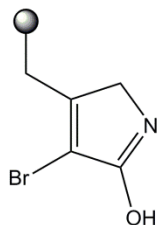

**SEBFUA**

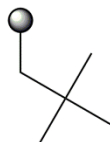

**SIMPIN**

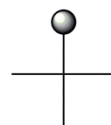

**SIMPOT**

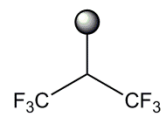

**SIMRAH**

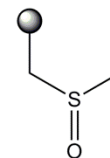

**SMECYO**

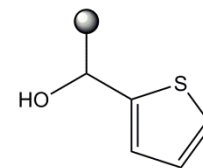

**THDSER**

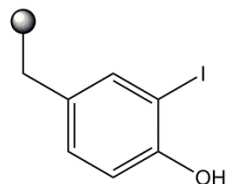

**TICFIV**  
**ZAMZES**

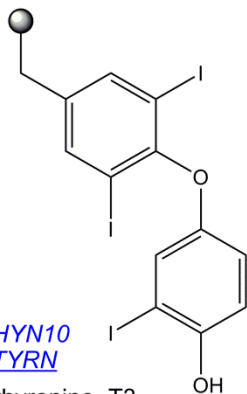

**TITHYN10**  
**+TITYRN**  
triiodothyronine, T3

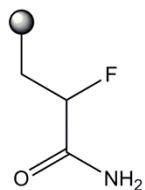

**UXOQII**

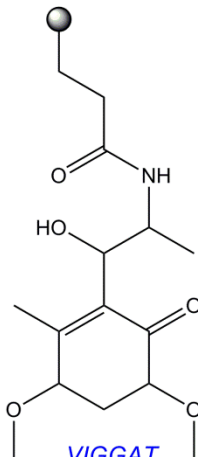

**VIGGAT**  
*lascivol*

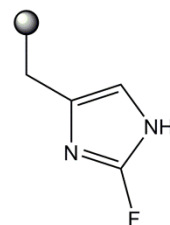

**VUZHAA**

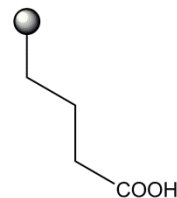

**VUYJEE**

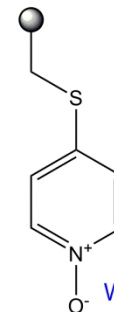

**WAHDIU**

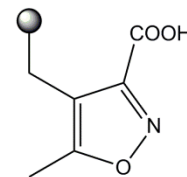

**WUHYED**

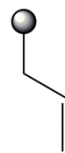

**XADTUR**

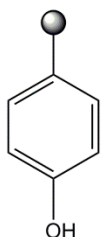

**XUKDEN**

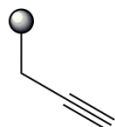

**YIJHOO**

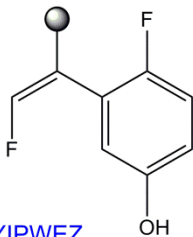

**YIPWEZ**  
**YIPWID**

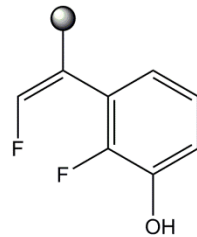

**YIPWOJ**

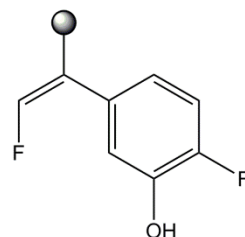

**YIPWUP**

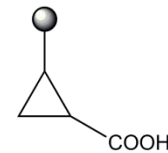

**ZOGTIE**  
**ZOGTUK**

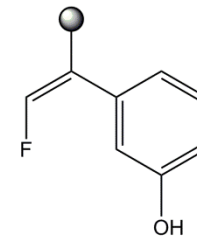

**ZULWEI**

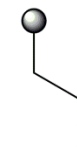

**ZZZODU01**  
**ZZZODU02**  
**+UHEPOM**

**z(-2)**

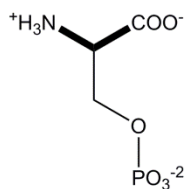

[ATEBAC](#)  
[ATEBIK](#)  
[ATEBIK01](#)

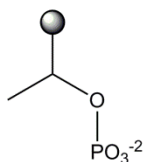

[GEJKUC](#)  
[IJICIN](#)

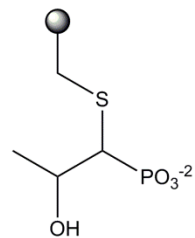

[HIKGIR](#)

**z(-1)**

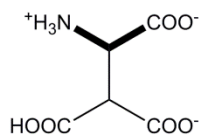

[ACXGLU](#)

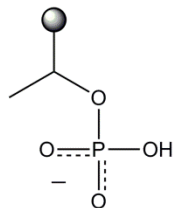

[GEDPIP](#)  
[IJICAF](#)  
[IJICEJ](#)  
[+POTHRE01](#)  
[+THREPO01](#)

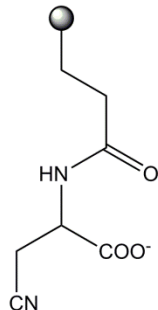

[HIBZUN](#)

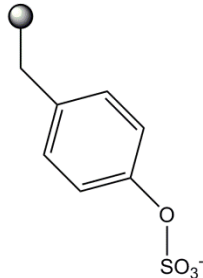

[KTYSUH10](#)

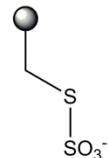

[LAKWEZ](#)

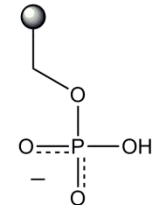

[LEPNAV\\*](#)  
[+SERIPH10](#)  
[+SERPOP01](#)

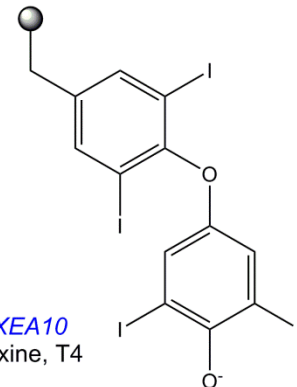

[TYRXEA10](#)  
thyroxine, T4

**z(1)**

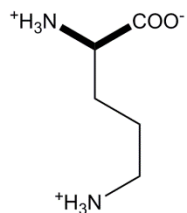

[CAPRAM](#)  
[DAHLOO](#)  
[ORNBDL10](#)  
[ORNHCL12](#)

[PUYVUA](#)  
[VUYHII](#)  
ornithine

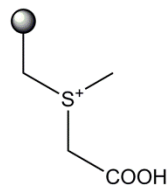

[CXMETN10](#)

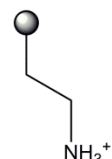

[DABUTA01](#)

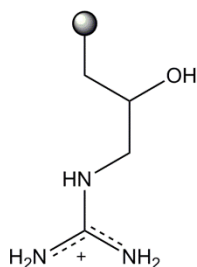

[HUCCUD](#)

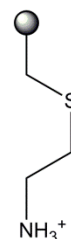

[JINGOC](#)

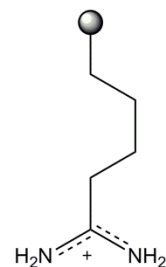

[KUFCIX](#)  
indospicine

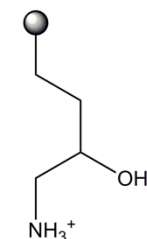

[ROLCOL](#)

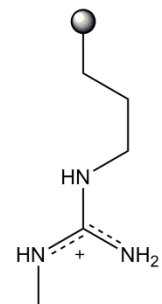

[SONSUK](#)  
[SONSUK01](#)

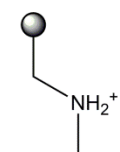

[YAKVOV](#)

**c(0)**

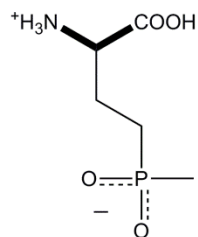

+BIPXED

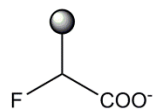

+BUTFUR

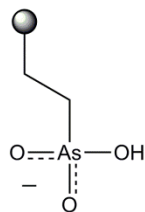

+CAXDEK

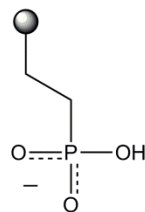

+CAXDIO01

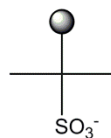

+CESKUG

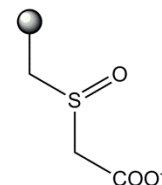

+CMXLCS

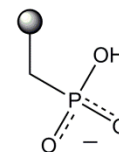

+CUFZAE

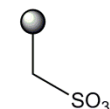

+CYSTAC02  
cysteic acid

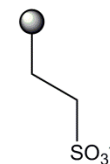

+HCYSAC

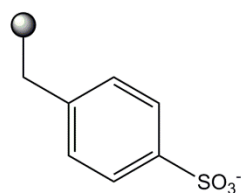

+IFIZIG02  
+IFIZIG04  
+VENLUW

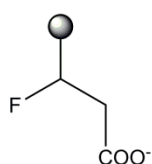

+KINWIN

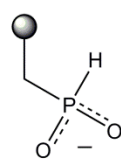

+LAVDER

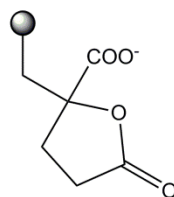

+LYCPER01

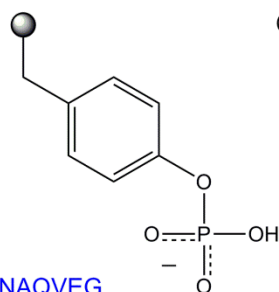

+NAQVEG

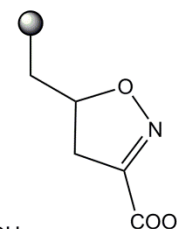

+NEWMOS

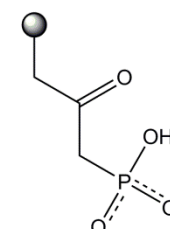

+POPJEJ

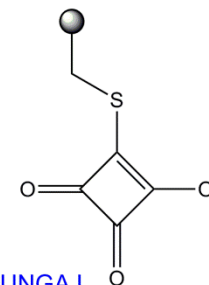

+RUNGAJ

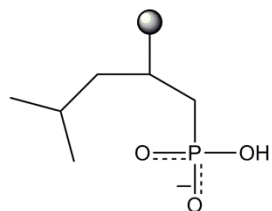

+ULIMOR

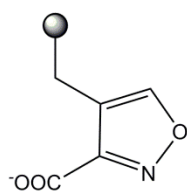

+WUHYIH

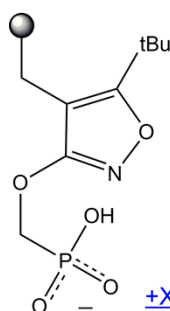

+XAPYET

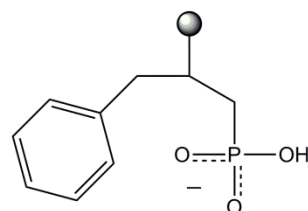

+YEPTAP

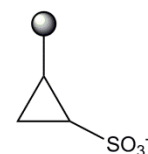

+YIZGAO  
+YODQIS  
+YODQOY

+POTHRE01  
+THREPO01  
see z(-1) GEDPIP

+SERIPH10  
+SERPOP01  
see z(-1) LEPNAW

c(1)

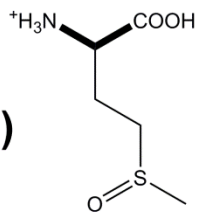

+AZIHUM

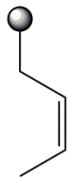

+BUTGLY

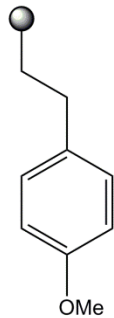

+CALKIL

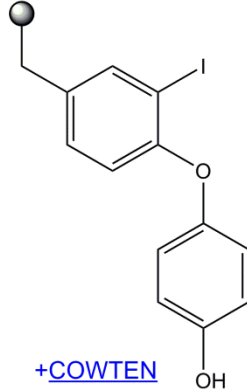

+COWTEN

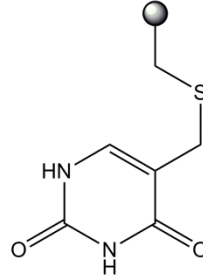

+CYSTYM

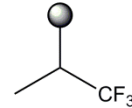

+DAFPOQ  
+DAFPUW

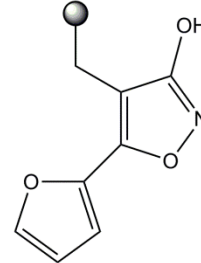

+GAFNAC

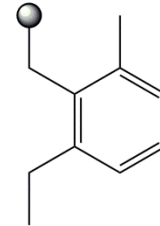

+GESQUR

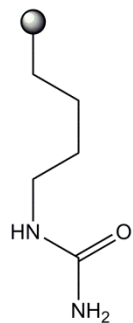

+HCITUL

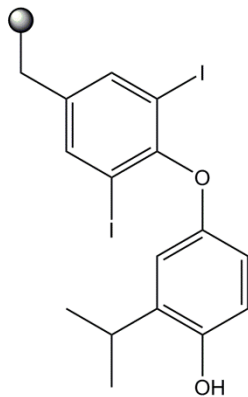

+IPLTYR10

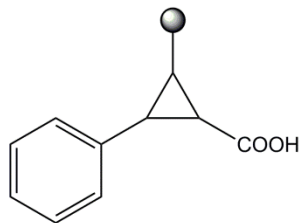

+KIZHAD  
+TAZQAM  
+TAZQIU

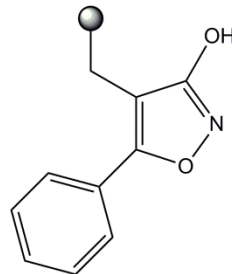

+LEPLUN

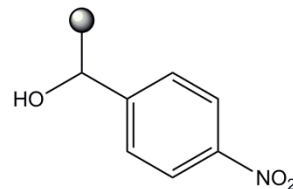

+LOBZOS

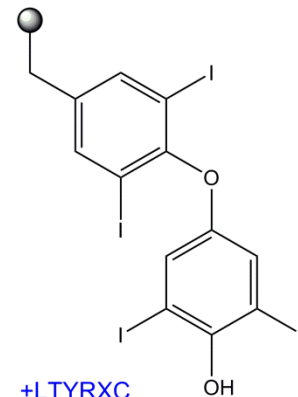

+LYRXC

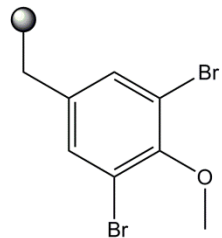

+MAFYOI

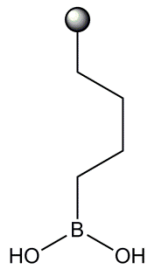

+NITFOL

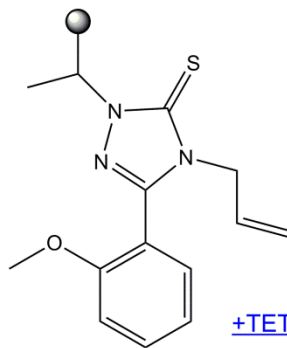

+TETYEX

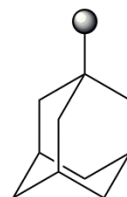

+UMURAW\*

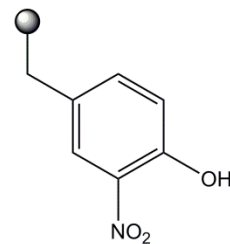

+VIGBUI

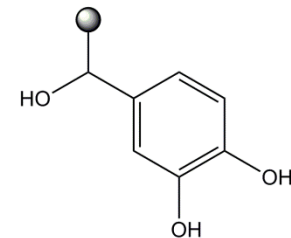

+XPSERC

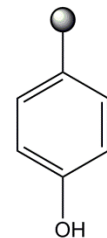

+ZIGJII  
+ZIGJOO



c(2)

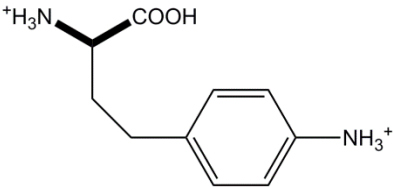

+AZOZIY

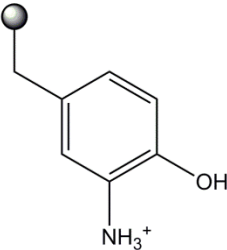

+FAPKEN

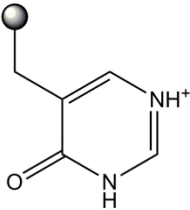

+QENMAX

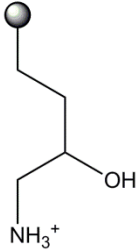

+ROLCUR  
+ROLDAY

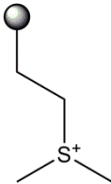

+SMMETC10

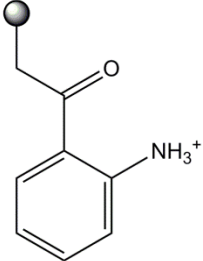

+WOCJON

**z(0)**

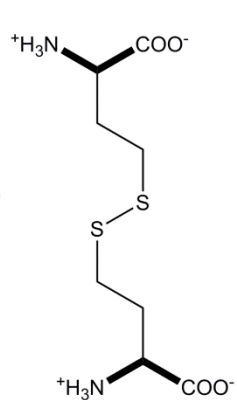

AMTBUA  
+AMTBUB

*DOLRUR*  
*JEDXAR*  
lanthionine  
*LANINE20*

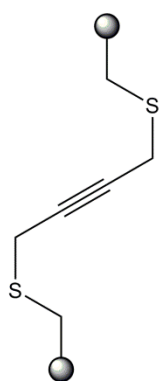

HUMSUD

*JABPEH*  
selenolanthionine

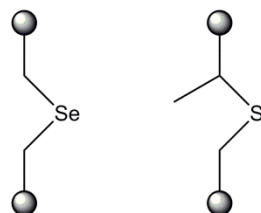

MLANTH10

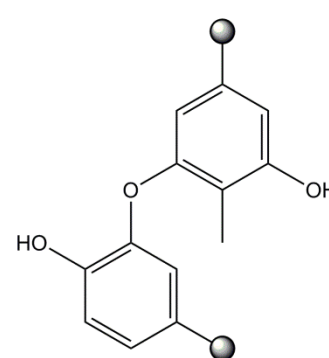

SEGSAY

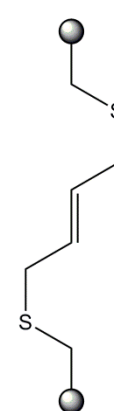

UGUGOS

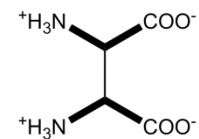

VUXJIH

**z(1)/mixed**

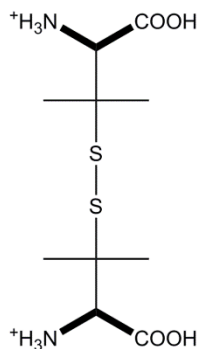

MDTBVL  
+PENICS10

MESO  
form

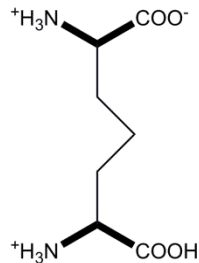

+LDAPCL  
+MDAPCL  
diaminopimelic acid

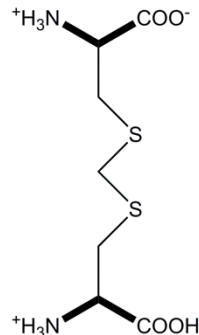

+BAZMOE

**z(0)**

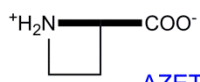

AZETAC

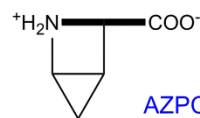

AZPCOH

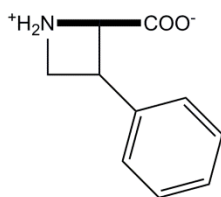

MATVAE

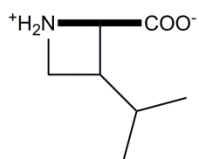

MATVEI

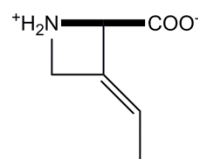

WAVKIN

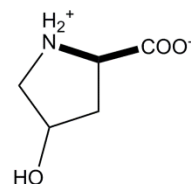

AHLPRO

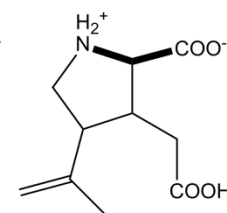

ALKINA01  
allo-kainic acid

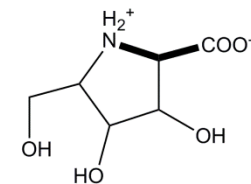

CUDCAG

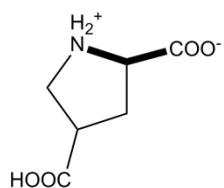

CXPROL

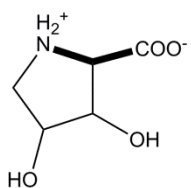

DHPROL10  
FIZDOH

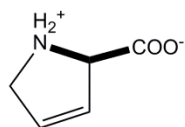

DHPROX

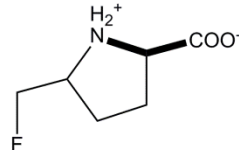

EQIHUI

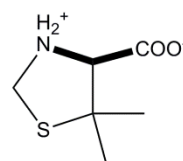

FOWLAE\*

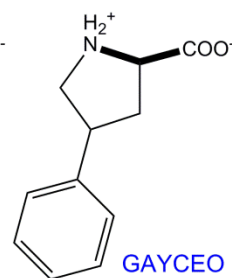

GAYCEO

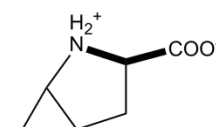

GEVMOK

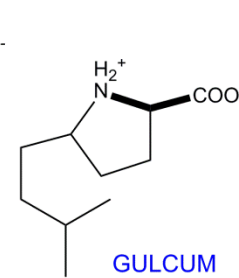

GULCUM

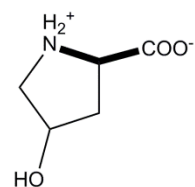

HOPROL12  
-CAPROL10

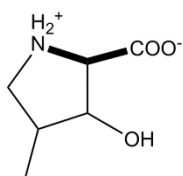

HXMPRO

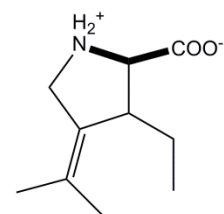

KAINAH

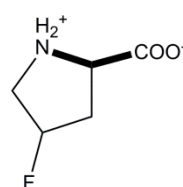

LEGBEG

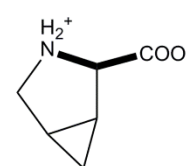

MPROLT  
+MPROLC

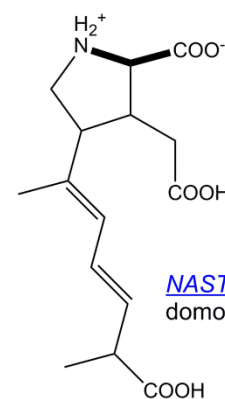

NASTUX  
domoic acid

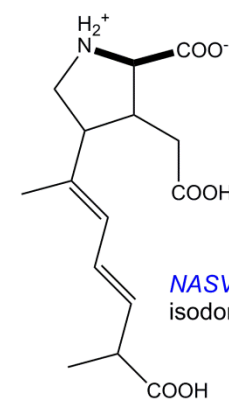

NASVAF  
isodomoic acid

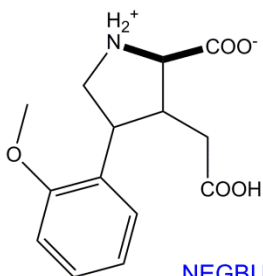

NEGBUW

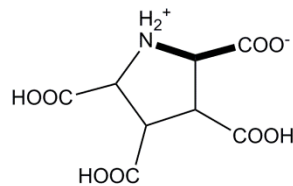

NEKCIP

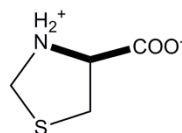

NELSEC  
TASOLC02  
+TPROCL

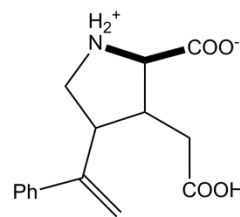

TUBQIQ

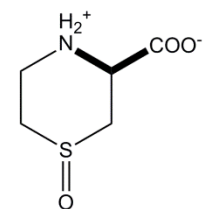

CHONDR

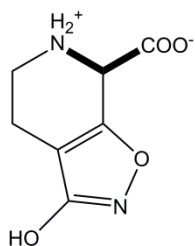

DECJAW01

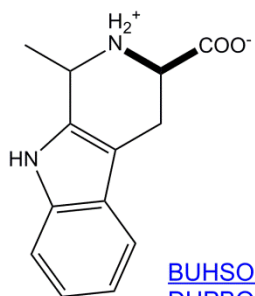

BUHSOM  
DUPBOG

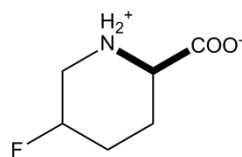

EQIHOC

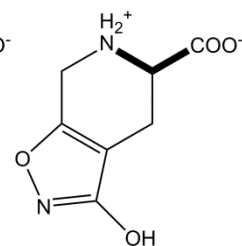

ERAHAG

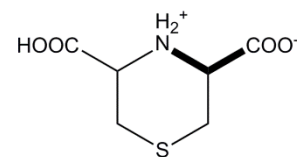

HABMUS  
LIVWOD

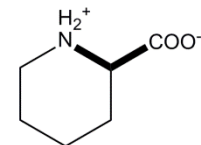

HOMPRO11  
QAMVAB  
WAHDUE  
+PAMCAH

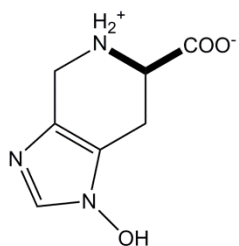

PANQIE

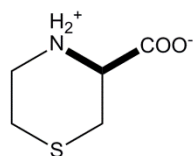

PTAZCK

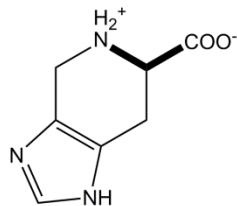

SPINCN

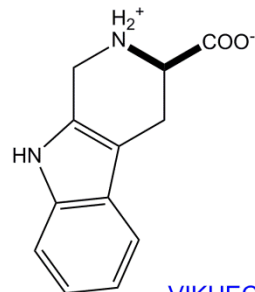

VIKHEC

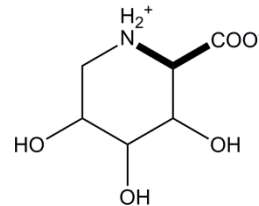

VIKGIG

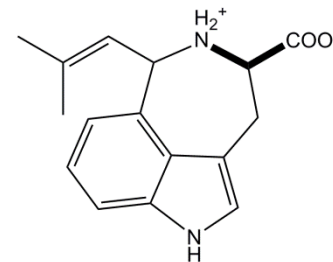

CLAVIC  
UNAKOK

**c(1)**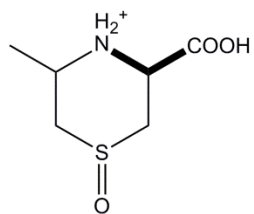+CALHCL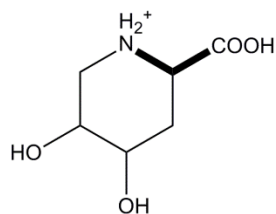+CHPIPC  
+CPIPCL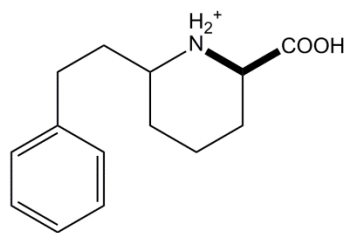+PAWSUB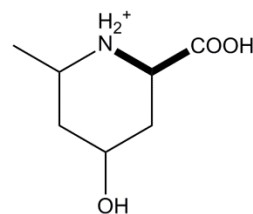+UTAFEB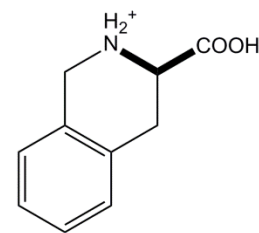WAPYOC**n(0)**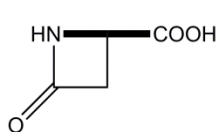

PELJUM

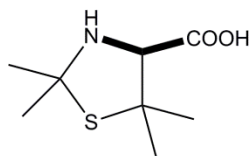

DILXAX

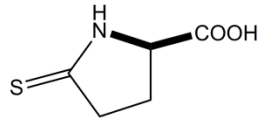

DODWEY

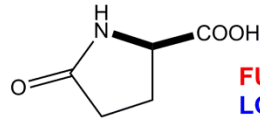FUHRAC  
LGPYRG  
LPYGLU  
PYRGLU01  
VAPMIX  
-VIWFOW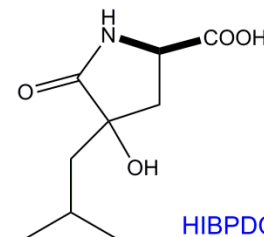

HIBPDC

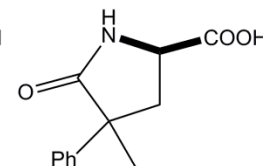

NAZLEG

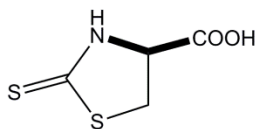

PEVNUZ01

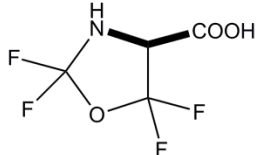QADBON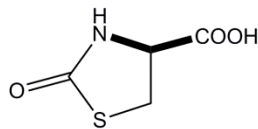

VENLOP

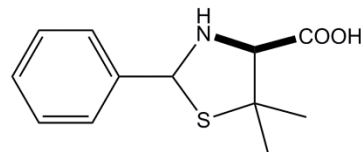

YESPER

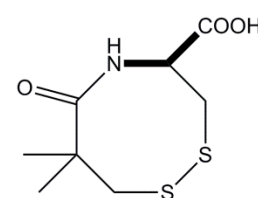

KOWMEO

**a(-1)**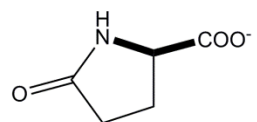-CPISIN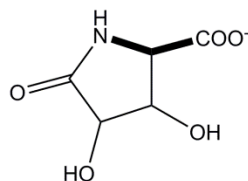-HOGZIN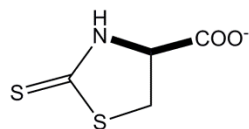-LIWHAA  
-LIWHEE**a(0)**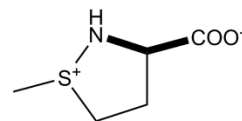-DEHMET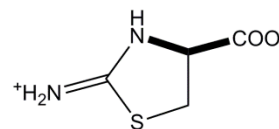-IMIPID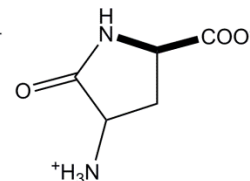-KUTCOS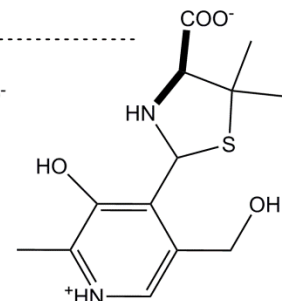

TAKGAN

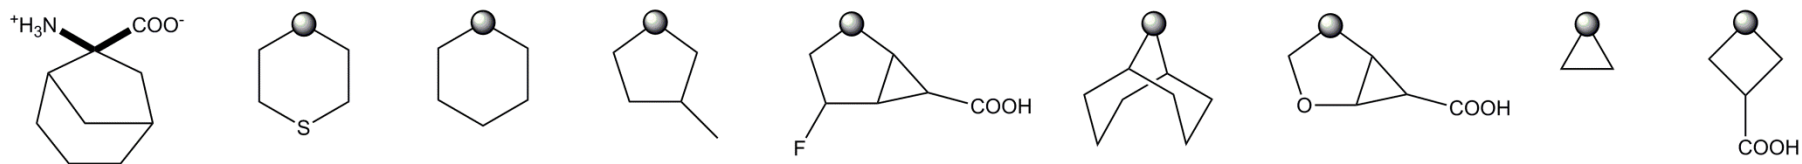

[ABCOCK](#)

ACXTPY  
+ATPYCX

ACYHXA01  
+AMCHXC02

[AMPCPA10](#)

[BETCUS](#)

[CIHMUB](#)  
+ABCNCX

[COKJER](#)

[FOBJUB](#)

[GEHBIE01](#)  
[MEGLAC](#)

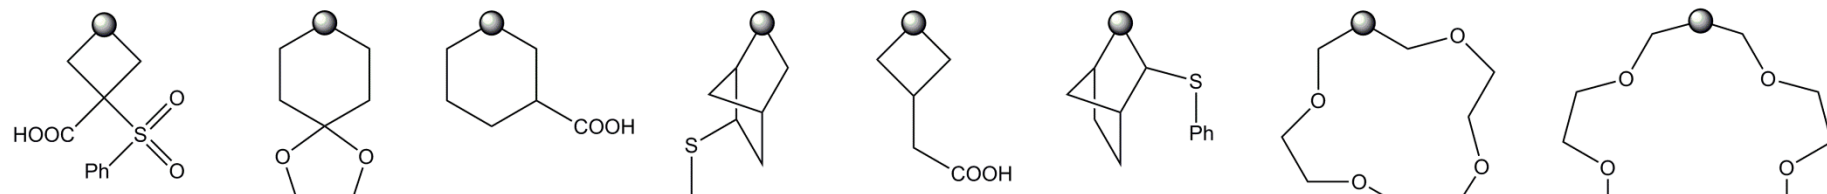

[GEHBOK](#)

JAPJUF

[JUXKES](#)

[KEPJOE](#)  
[PACWOF](#)

[KIDHOU](#)

[NAVKIG\\*](#)

OHEXUU

OHEYAB

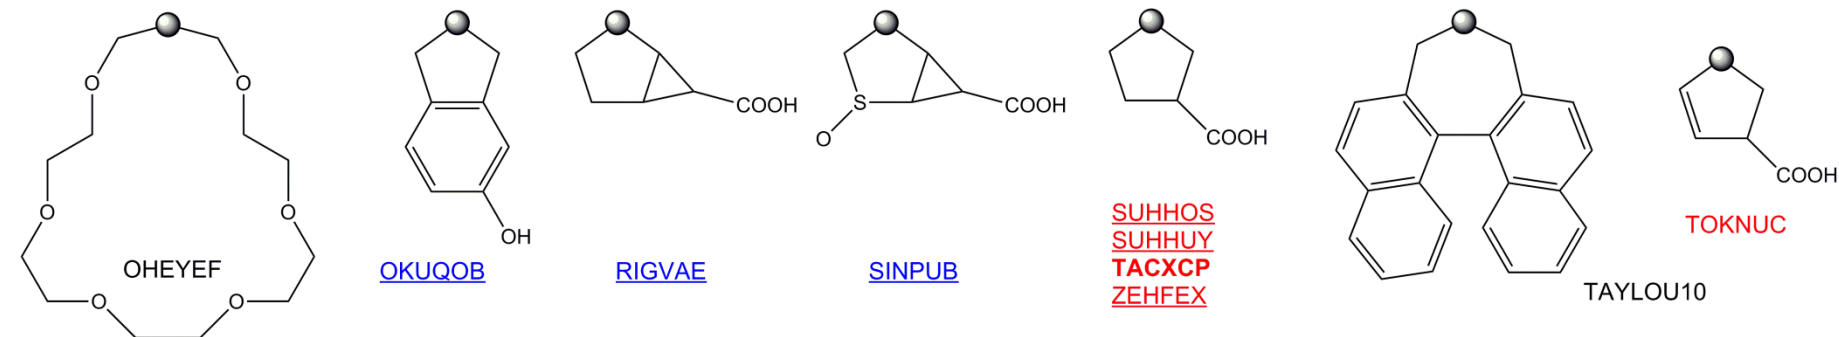

OHEYEF

[OKUQOB](#)

[RIGVAE](#)

[SINPUB](#)

[SUHHOS](#)  
[SUHHUY](#)  
[TACXCP](#)  
[ZEHFEX](#)

TAYLOU10

[TOKNUC](#)

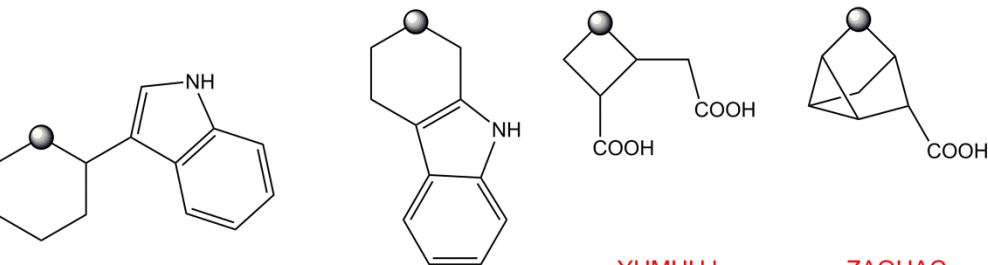

[UHAWUV](#)

[YOFHEG](#)

[YUMHUJ](#)

[ZAQHAC](#)

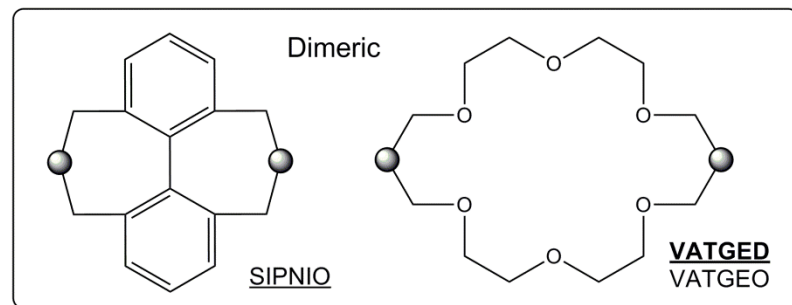

**z(0)**

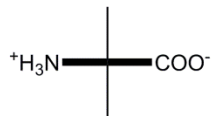

AMMPRA01  
+HOTHII  
+KENDOW

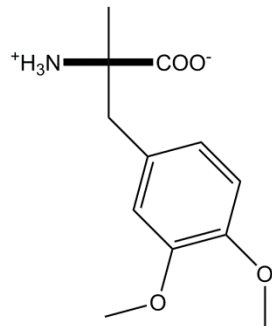

CITZIO10  
COSGUM

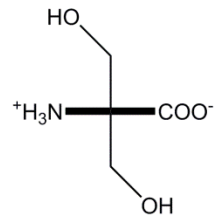

DILFEJ

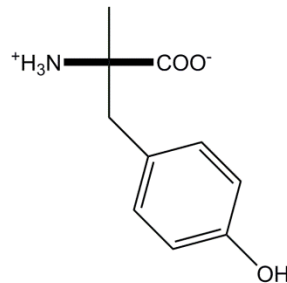

DMTYRS

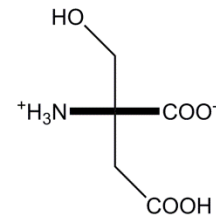

HMEASP

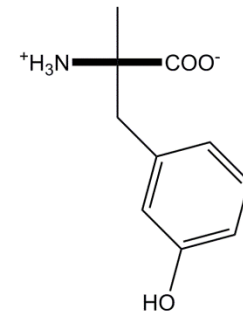

MENTYR10

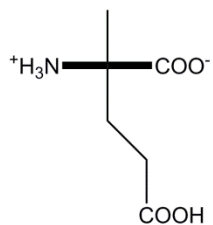

MGLUAH10

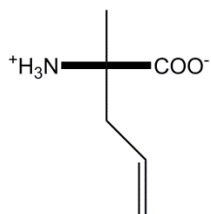

OBAYOF

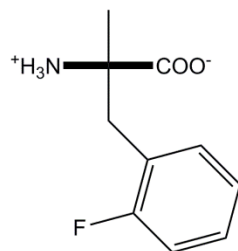

QORRIY

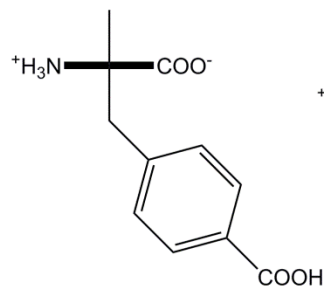

REMVEK

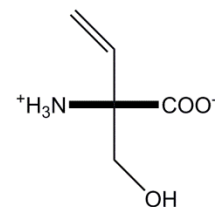

SARBUI

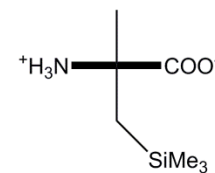

XUPGIZ

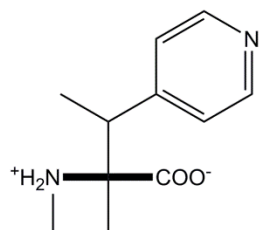

TACLEO

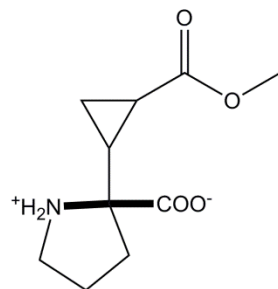

ZOCJOQ

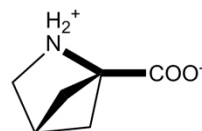

MEPROL

c(1)

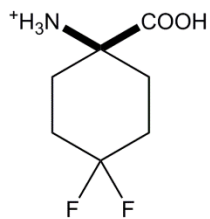

+GIJBUY

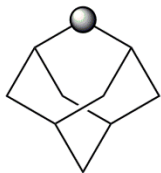

+AADAMC  
+RECBAE

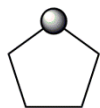

+ACPABR  
+AMCPCX

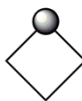

+AMCBCX

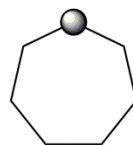

+AMCHPA01

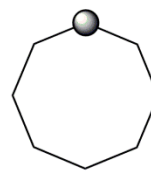

+AMCOCA

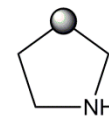

+CRCURB

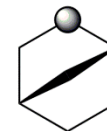

EXABNC

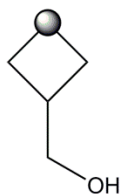

+FINPEX

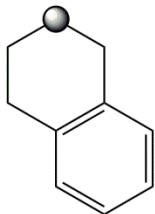

+RIPZOF

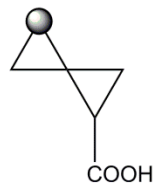

+UGIUW  
+UGIRAD  
+UGIREH

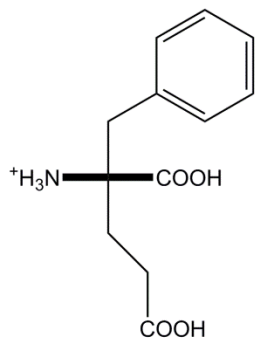

+BGLUTM

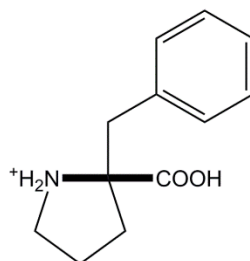

+IDIMIT



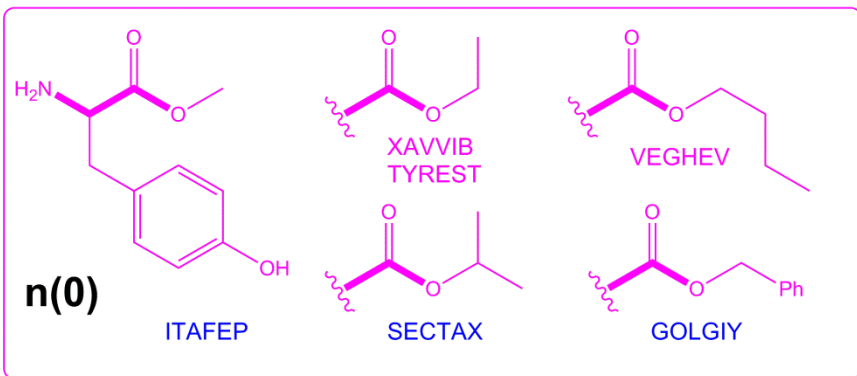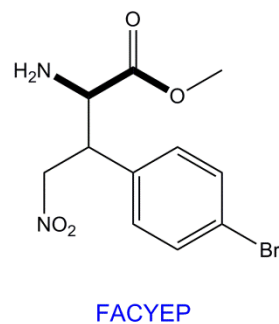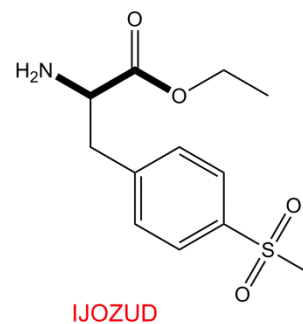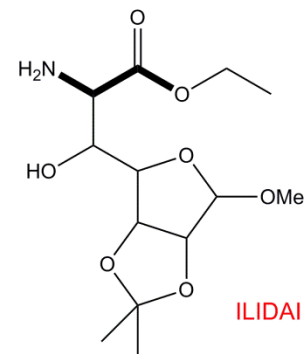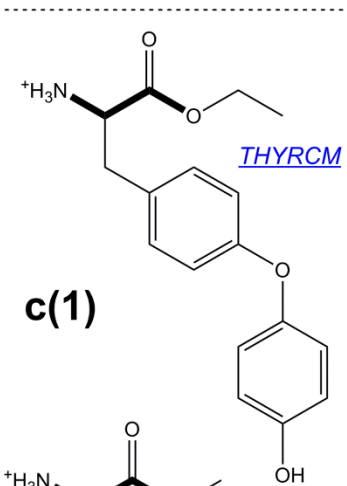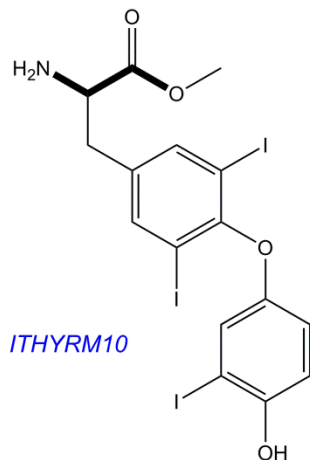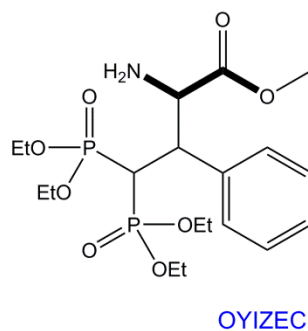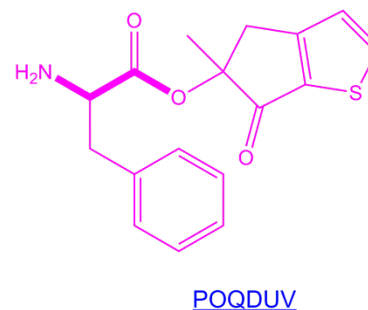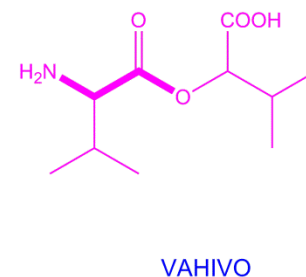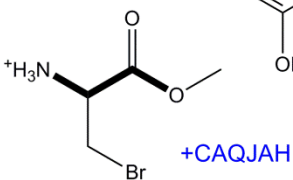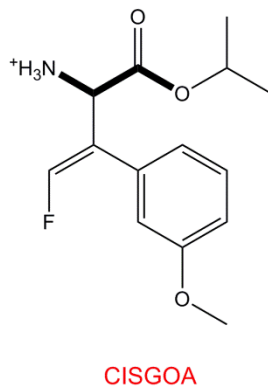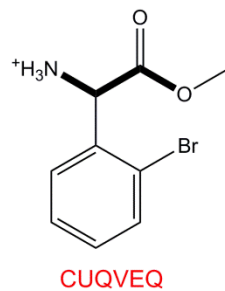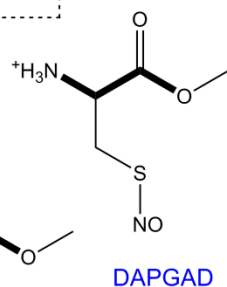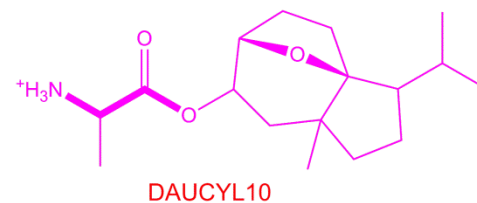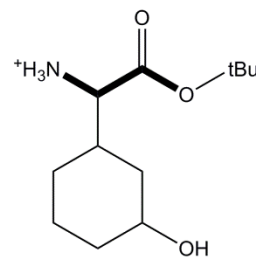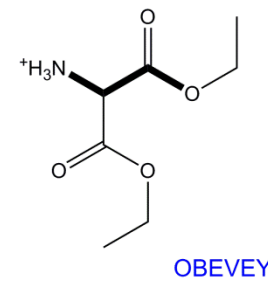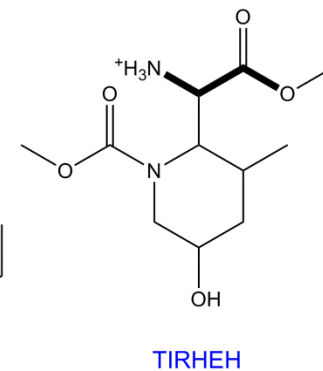

standard  
amino acid

**TETRADENTATE**  
**TRIDENTATE**  
 BIDENTATE ON  
*BIDENTATE NX'*  
 monodentate

**a(-1)**

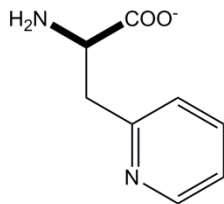

ALTOCO  
 BAMTUE01  
**PYALCV**

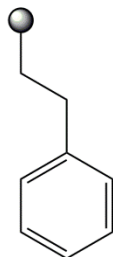

APBMGH

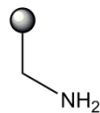

**APRCOB**  
 DAPCLC  
 GAWYOS  
 JAHNEM  
 PASKOK  
**SOPJEN**  
 XAXNOZ  
**YEWNUK**

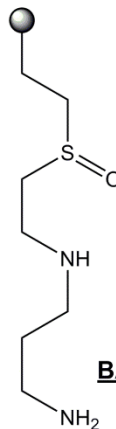

**BABREB**

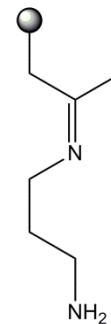

**BAKXER**

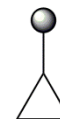

BAKROV  
 BAKRUB

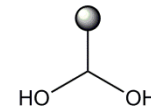

BUWJIM

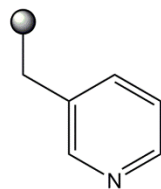

**CAPVUK**

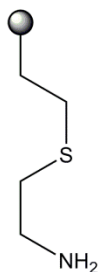

**CEFTAI**

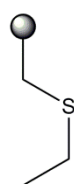

*BIWFIW*

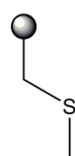

CIWLID10 MCYSCD  
 CYSHGA **MCYSCO**  
 DAPKEM MCYSZN  
 GEVLID WEXYII  
 MCYECO WEXYOO

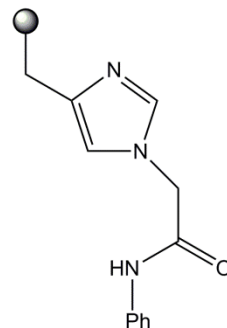

**EHUGOD**

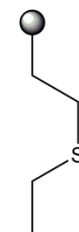

cysghb  
 ETHCPD  
 SIXGIP

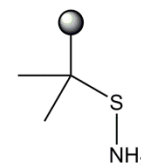

*FEZFEW*

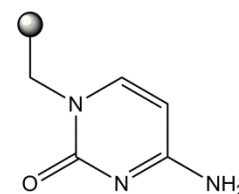

FIZLUW

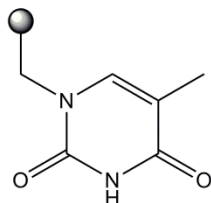

FIZMAD

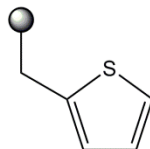

foqhuo

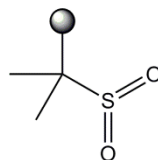

**HIGYOL-(1)**

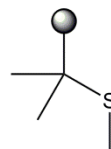

**HIGYOL-(2)**

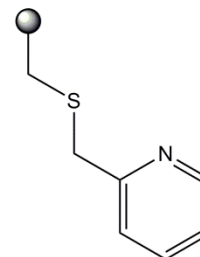

**HUQGOQ**

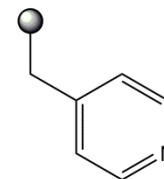

HAWBOY

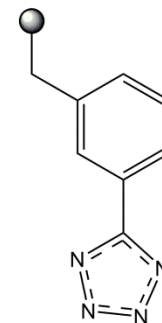

INOXUE  
 INOYAL

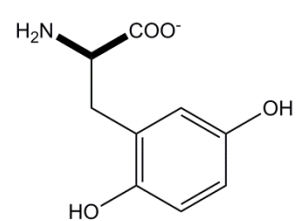

JUFWAI

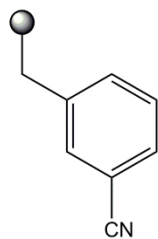

KEKJER

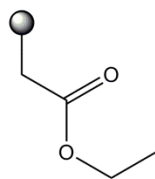

LALYUU

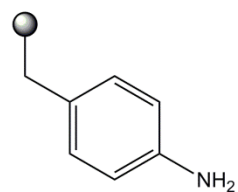

MIVCUQ

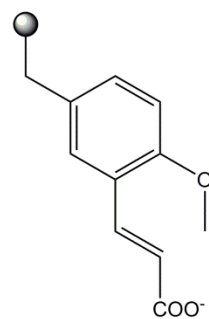

MIVDEB

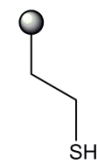

NEQYEN

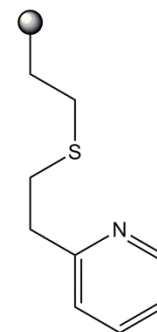

QAQJEY

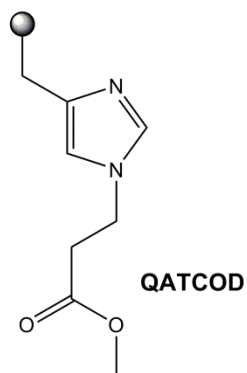

QATCOD

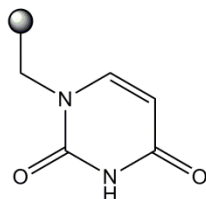

TASHOK

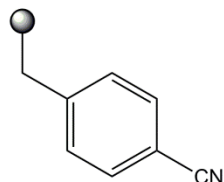

VAYTIY

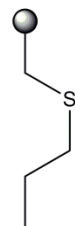

WAQTIS

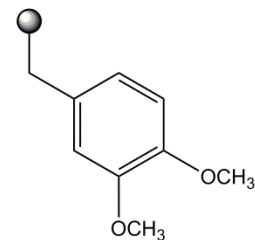

WUPGEU

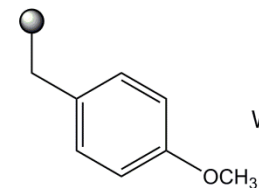

WUPGIY

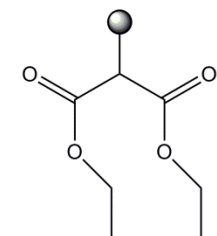

XOTRAZ

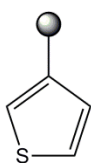

YESFEH

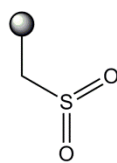

YIXPAW10

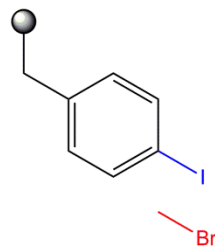

ZEDBOZ  
ZEDCAM01  
ZEDBUF

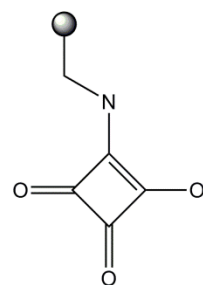

ZILSES

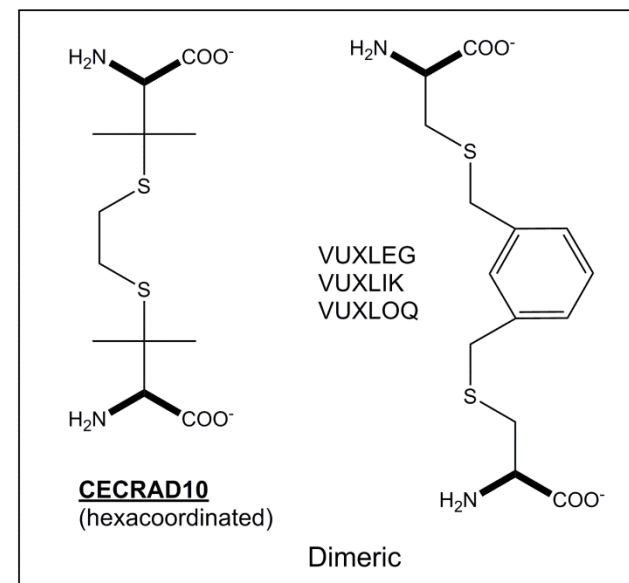

Supplement: Supplementary file 1 [file 2]
